# Supplementary material for: Transport and storage of anthropogenic C in the North Atlantic Subpolar Ocean
Source: Copernicus journal article supplement (doi:10.5194/bg-15-4661-2018), 2018-07-30
Supplement: Supplementary file 1 [file bg-15-4661-2018-supplement.pdf]

Supplement of Biogeosciences, 15, 4661–4682, 2018  
<https://doi.org/10.5194/bg-15-4661-2018-supplement>  
© Author(s) 2018. This work is distributed under  
the Creative Commons Attribution 3.0 License.

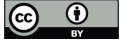

*Supplement of*

## **Transport and storage of anthropogenic C in the North Atlantic Subpolar Ocean**

**Virginie Racapé et al.**

*Correspondence to:* Virginie Racapé ([virginie.racape@ifremer.fr](mailto:virginie.racape@ifremer.fr))

The copyright of individual parts of the supplement might differ from the CC BY 3.0 License.

## 1 Supplement

### 2 S1. Evaluation of the proxy proposed by Zunino et al. (2014) in ORCA05-PISCES

3 Zunino et al. (2014) proposed a novel proxy to evaluate processes governing the long term  
4 changes of Cant transport in the northern region of the North Atlantic subpolar gyre. This  
5 proxy ( $T_{Cant}^{\circ}$ ) was computed from the intensity of the meridional overturning circulation  
6 (MOC) times the difference of averaged-Cant concentrations between the northward flow of  
7 warm and saline upper ocean waters, rich in Cant, and the southward return flow of colder  
8 and fresher waters across a section (noted  $\Delta[Cant]$ , Eq. (S1)). In this region, the MOC  
9 intensity was computed in density coordinates to remove depth overlaps between its upper  
10 and lower limbs (Marsh et al., 2005; Lherminier et al., 2007). It was calculated as the  
11 integration of volume transport from Greenland to Portugal and from bottom to each density  
12 level. Maximum negative value corresponds thus to the net southward transport of the lower  
13 MOC; the absolute value of this estimate corresponds to the intensity of the MOC ( $MOC_{\sigma}$  in  
14 Eq. (S1)). In the model, the proxy ( ${}^mT_{Cant}^{\circ}$ ) was evaluated from monthly simulations over the  
15 period 2002-2010.

16

$$17 \quad {}^mT_{CANT}^{\circ} = MOC_{\sigma} \Delta[C_{ANT}] \quad (S1)$$

18

19  $T_{Cant}^{\circ}$  was defined by Zunino et al. (2014) as the proxy of the diapycnal component of the  
20 advective transport of Cant across the OVIDE section. It could be used in the model if (1) the  
21 diapycnal transport of Cant ( ${}^mT_{Cant}^{diap}$ ) is the major mechanism driving changes in Cant  
22 advective transport across the OVIDE section and if (2)  $T_{Cant}^{\circ}$  is a good proxy of  ${}^mT_{Cant}^{diap}$ .

23

#### 24 S1.1. Is ${}^mT_{Cant}^{diap}$ the major mechanism driving the ${}^mT_{CANT}^{adv}$ variability?

25 In the offline approach, the simulated advective transport of Cant ( $[{}^mT_{Cant}^{adv}]^{offline}$ ) was  
26 decomposed in three components along the Greenland-Portugal OVIDE section (Eq. (S2)) to  
27 compare with results from Zunino et al. (2014). The approach was initially developed by  
28 Bryden and Imawaki (2001) to study heat transport and was recently adapted by Zunino et al.  
29 (2014) for Cant advective transport ( ${}^mT_{Cant}^{adv} = [{}^mT_{Cant}^{adv}]^{offline}$ ). Application of this approach to  
30 monthly model output allowed to infer (i) the isopycnal transport of Cant across the OVIDE  
31 section, noted  ${}^mT_{Cant}^{iso}$ , (ii) the diapycnal transport of Cant ( ${}^mT_{Cant}^{diap}$ ), related to the  
32 overturning circulation and (iii) the net transport of Cant ( ${}^mT_{Cant}^{net}$ ), related to the arctic mass  
33 balance (Lherminier et al., 2007).

34

$$35 \quad \left[ {}^m T_{Cant}^{adv} \right]^{offline} = {}^m T_{Cant}^{adv} = {}^m T_{Cant}^{net} + {}^m T_{Cant}^{diap} + {}^m T_{Cant}^{iso} \quad (S2)$$

36

37 The decomposition of the advective transport of Cant across the Greenland-Portugal OVIDE  
38 section yielded 2002-2010 mean values of diapycnal, isopycnal and net transport of Cant of  
39  $178 \pm 42 \text{ kmol s}^{-1}$ ,  $-97 \pm 24 \text{ kmol s}^{-1}$  and  $13 \pm 9 \text{ kmol s}^{-1}$  respectively. The sum was equal to  
40  ${}^m T_{Cant}^{adv}$  and amounts to  $94 \pm 43 \text{ kmol s}^{-1}$ . It's coherent with values computed online from 5  
41 day averages ( $90 \pm 44 \text{ kmol s}^{-1}$ ). Both estimates (online and offline) are strongly correlated  
42 ( $r=0.94$ ,  $p\text{-value} = 0.00$ ;  $r^2 = 0.89$ , Fig. S1a). In general, the model results were lower than  
43 those obtained from observation-based assessments (Table S1). However and as expected, the  
44 diapycnal component drives a large northward transport of Cant-rich waters across the  
45 section. It is partially compensated by the isopycnal component, yielding a negligible net  
46 transport (Fig. S4a). Moreover, the correlation between  ${}^m T_{Cant}^{adv}$  and each transport  
47 component ( ${}^m T_{Cant}^{diap}$ ,  ${}^m T_{Cant}^{iso}$  and  ${}^m T_{Cant}^{net}$ ) was only significant with the diapycnal  
48 component ( $r = 0.75$ ,  $p\text{-value} = 0.00$  from all simulations;  $r = 0.89$ ,  $p\text{-value} = 0.00$  from June  
49 simulations; Fig.S1a). The diapycnal component explain from 60% (full model output over  
50 OVIDE period) to 78% (June outputs) of  ${}^m T_{Cant}^{adv}$  variability. These results attest that the  
51 variability of the ORCA05-PISCES advective transport of Cant is controlled by those of the  
52 diapycnal component, which validates the first condition to be satisfied in order to use the  
53 proxy in the model.

54

### 55 SI.2. Is $T_{Cant}^{\circ}$ a good proxy of ${}^m T_{Cant}^{diap}$ ?

56 The mean value of  $T_{Cant}^{\circ}$  derived from model output is higher by  $155 \pm 57 \text{ kmol s}^{-1}$  compared  
57 with  ${}^m T_{Cant}^{diap}$ , while the difference between the proxy and the diapycnal component estimated  
58 by Zunino et al. (2014) is only of  $22 \text{ kmol s}^{-1}$ . In the model,  $T_{Cant}^{\circ}$  is not equal to  ${}^m T_{Cant}^{diap}$ .  
59 This curiosity is probably due to the parametrizations of the two quantities.  ${}^m T_{Cant}^{\circ}$  is in fact a  
60 proxy of diapycnal transport of Cant based on the assessments of the MOC magnitude times  
61  $\Delta C_{ant}$  between both limbs of the MOC (Eq. (S1)) whereas  ${}^m T_{Cant}^{diap}$  (Eq. (S2)) is a direct  
62 estimation using Cant concentration times velocity of each grid level. The underestimation of  
63 the MOC magnitude and  $\Delta C_{ant}$  by the model is not as large as those detected on the volume  
64 transport (Fig. 5) and the Cant concentration (Fig. 6) in Sect. 3.1. This implies that the  
65 difference between  $T_{Cant}^{\circ}$  from model output and  $T_{Cant}^{\circ}$  from OVIDE data set (Table S1) is  
66 not as large as the model-data differences obtained for  $T_{Cant}^{diap}$ . In the model,  $T_{Cant}^{\circ}$  also

67 presents a seasonal cycle with an amplitude higher than  $100 \text{ kmol s}^{-1}$ , in phase (opposite) with  
68 those observed on  $\text{MOC}\sigma$  and on  $\Delta\text{Cant}$  (Figs. S1b to S1c). This seasonal organization is not  
69 detected on  ${}^m\text{T}_{\text{Cant}}^{\text{diap}}$  and  ${}^m\text{T}_{\text{Cant}}^{\text{adv}}$  (Fig. S1). This is confirmed by the small correlation  
70 obtained between the proxy and  ${}^m\text{T}_{\text{Cant}}^{\text{diap}}$  ( $r = 0.18$ ,  $p\text{-value} = 0.04$ ) or between the proxy and  
71  ${}^m\text{T}_{\text{Cant}}^{\text{adv}}$  ( $r = 0.33$ ,  $p\text{-value} = 0.00$ ) over the full period (2002-2010). It should be noted that the  
72 correlation between  ${}^m\text{T}_{\text{Cant}}^{\circ}$  and  ${}^m\text{T}_{\text{Cant}}^{\text{diap}}$  from June simulations ( $r=0.66$ ,  $p\text{-value} = 0.03$ ) is  
73 comparable with the observations. This is not observed for those estimated between  ${}^m\text{T}_{\text{Cant}}^{\circ}$   
74 and  ${}^m\text{T}_{\text{Cant}}^{\text{adv}}$  ( $r = 0.35$ ,  $p\text{-value} = 0.29$ ). These comments refute thus the second condition to  
75 use the estimator to disentangle the effect of both circulation and Cant accumulation  
76 variability on the Cant transport variability.

77  
78 **Table S1:** Model-data comparison over the period covered by OVIDE cruises (2002-2010).  
79 Average and standard deviation (SD) for observation-based estimates (column 2) and model  
80 outputs (columns 3 to 5). Model outputs: (1) June average with SD being a measure of  
81 interannual variability, (2) average year with SD corresponding to the average seasonal  
82 variability, or (3) average over the full period with SD being representative of total variability  
83 (interannual + seasonal).

|                                                                 | OVIDE data set    |                   | ORCA05-PISCES    |                  |
|-----------------------------------------------------------------|-------------------|-------------------|------------------|------------------|
|                                                                 |                   | June only         | Average year     | Full period      |
| $\text{T}_{\text{Cant}}^{\circ}$ ( $\text{kmol s}^{-1}$ )       | $413.1 \pm 70.4$  | $332.0 \pm 27.0$  | $338.0 \pm 19.2$ | $333.5 \pm 50.8$ |
| $\text{T}_{\text{Cant}}^{\text{diap}}$ ( $\text{kmol s}^{-1}$ ) | $391.2 \pm 79.2$  | $201.5 \pm 30.9$  | $178.2 \pm 9.2$  | $178.1 \pm 41.8$ |
| $\text{T}_{\text{Cant}}^{\text{iso}}$ ( $\text{kmol s}^{-1}$ )  | $-164.5 \pm 16.2$ | $-112.7 \pm 13.3$ | $-97.0 \pm 7.8$  | $-96.5 \pm 24.1$ |
| $\text{T}_{\text{Cant}}^{\text{net}}$ ( $\text{kmol s}^{-1}$ )  | $21.0 \pm 17.5$   | $3.6 \pm 6.3$     | $13.9 \pm 5.4$   | $12.7 \pm 8.8$   |
| $\text{T}_{\text{Cant}}^{\text{adv}}$ ( $\text{kmol s}^{-1}$ )  | $247.7 \pm 77.3$  | $92.4 \pm 32.4$   | $95.1 \pm 13.48$ | $94.3 \pm 42.6$  |

84  
85  
86 Fig. S1 : 2002-2012 monthly evolution of (a) the diapycnal (blue), isopycnal (red), net (green)  
87 and total (black) transport of Cant and  $\text{T}_{\text{Cant}}^{\circ}$  (magenta) ( $\text{kmol s}^{-1}$ ), of (b) the magnitude of the  
88 MOC ( $\text{MOC}\sigma$ ,  $\text{Sv}$ ), and of (c) the Cant concentration in the upper (triangles) and the lower  
89 (inverse triangles) MOC ( $\mu\text{mol kg}^{-1}$ ) computed in offline either from model output  
90 (continuous line) or from observation-based assessments (dotted line) for the Greenland-  
91 Portugal OVIDE section. Colored dots symbolize the month June. On panel (a), time series in  
92 grey represents the total transport of Cant computed in online by the model (including  
93 advective, diffusive and eddies terms).

94

95 **S2. Description of section in the model**

96 The sections at 25°N, 36°N, OVIDE or at the sills were collocated in the model as a  
97 continuous line between A and B defined by zonal ( $y$ ) or meridional ( $x$ ) grid segments.

98 Horizontal velocities ( $\vec{u}$  and  $\vec{v}$ ) used to estimate mass transport across a section were towards  
99 the North (for  $\vec{v}$ ) if orthogonal to grid segment  $x$  and towards the East (for  $\vec{u}$ ) if orthogonal to  
100 grid segment  $y$  (Fig. S2).

101

102 Fig. S2: Schematic representation of section in the model

103

104 **S3. Online computation of transport of Cant across a section**

105 Fig. S3: Transport of Cant across (from top to bottom) 25° N, 36° N and OVIDE sections  
106 computed online by ORCA05-PISCES over the period 2003-2011 (monthly resolution). In the  
107 online approach, the transport of Cant ( ${}^mT_{\text{Cant}}^{\text{online}}$ , black bold line) is the sum of the advection  
108 ( ${}^mT_{\text{Cant}}^{\text{adv}}$ , red fine line), the diffusion ( ${}^mT_{\text{Cant}}^{\text{lf}}$ , blue fine line) and the eddy ( ${}^mT_{\text{Cant}}^{\text{eiv}}$ , green  
109 fine line) contributions. For each section,  ${}^mT_{\text{Cant}}^{\text{adv}}$  is the major component of  ${}^mT_{\text{Cant}}^{\text{online}}$ .

110

111 **S4. Volume and Cant transported within water classes at 25°N, 36°N and at the**  
112 **OVIDE section.**

113 Fig S4a: Simulated annual time series of Cant and volume transported ( $\text{Pg yr}^{-1}$ ) by the  
114 northward (full line) and southward (dashed line) following components of NACW (class 1)  
115 through 25°N (green), 36°N (red) and OVIDE (black) over the period 1959-2011.

116

117 Fig S4b: Simulated annual time series of Cant and volume transported ( $\text{Pg yr}^{-1}$ ) within IW  
118 (class 2) through 25°N (green), 36°N (red), OVIDE (black) and the Greenland-Iceland-  
119 Scotland sills (blue) over the period 1959-2011.

120

121 Fig S4c: Simulated annual time series of Cant and volume transported ( $\text{Pg yr}^{-1}$ ) within  
122 NADW (Class 3) through 25°N (green), 36°N (red), OVIDE (black) and the Greenland-  
123 Iceland-Scotland sills (blue) over the period 1959-2011.

124

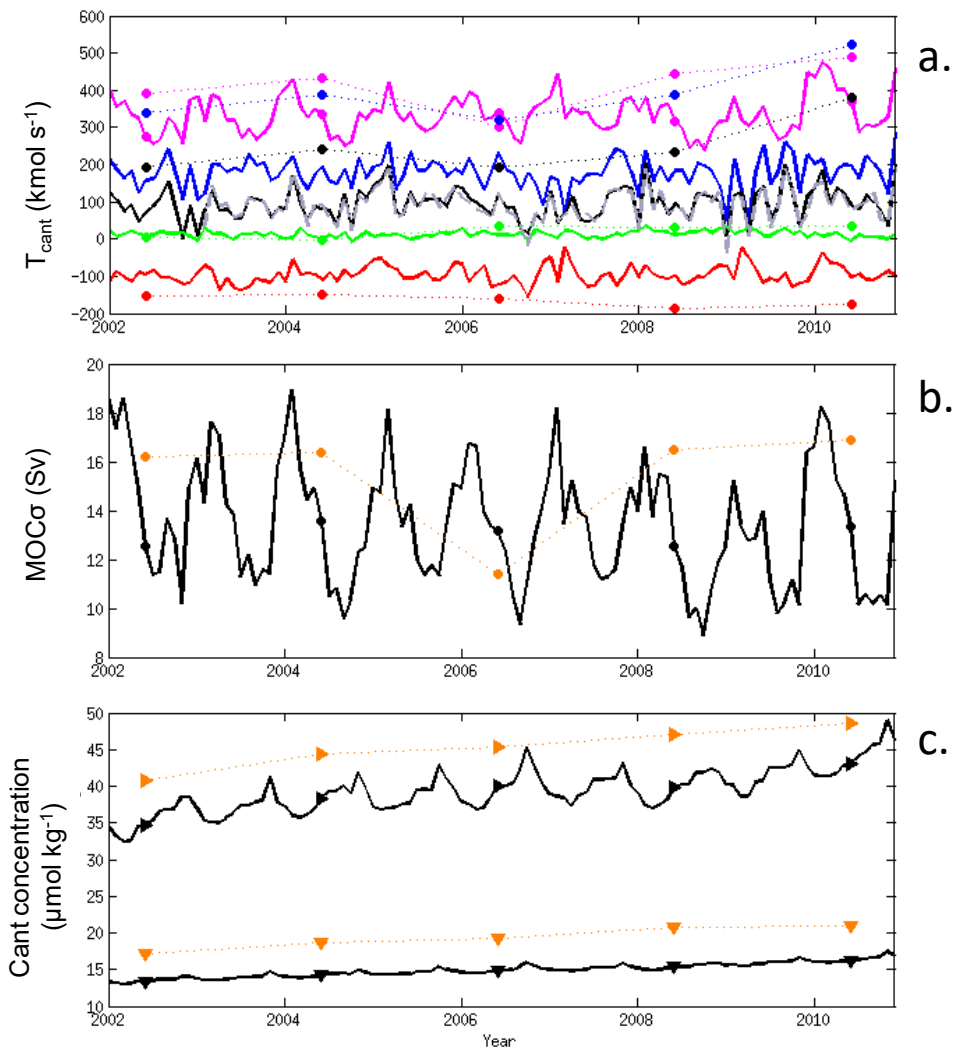

Fig. S1 : 2002-2012 monthly evolution of (a) the diapycnal (blue), isopycnal (red), net (green) and total (black) transport of Cant and  $T_{\text{Cant}^\circ}$  (magenta) ( $\text{kmol s}^{-1}$ ), of (b) the magnitude of the MOC ( $\text{MOC}\sigma$ , Sv), and of (c) the Cant concentration in the upper (triangles) and the lower (inverse triangles) MOC ( $\mu\text{mol kg}^{-1}$ ) computed in offline either from model outputs (continuous line) or from observation-based assessments (dotted line) for the Greenland-Portugal OVIDE section. Colored dots symbolize the month June. On panel (a), time series in grey represents the total transport of Cant computed in online by the model (including advective, diffusive and eddies terms).

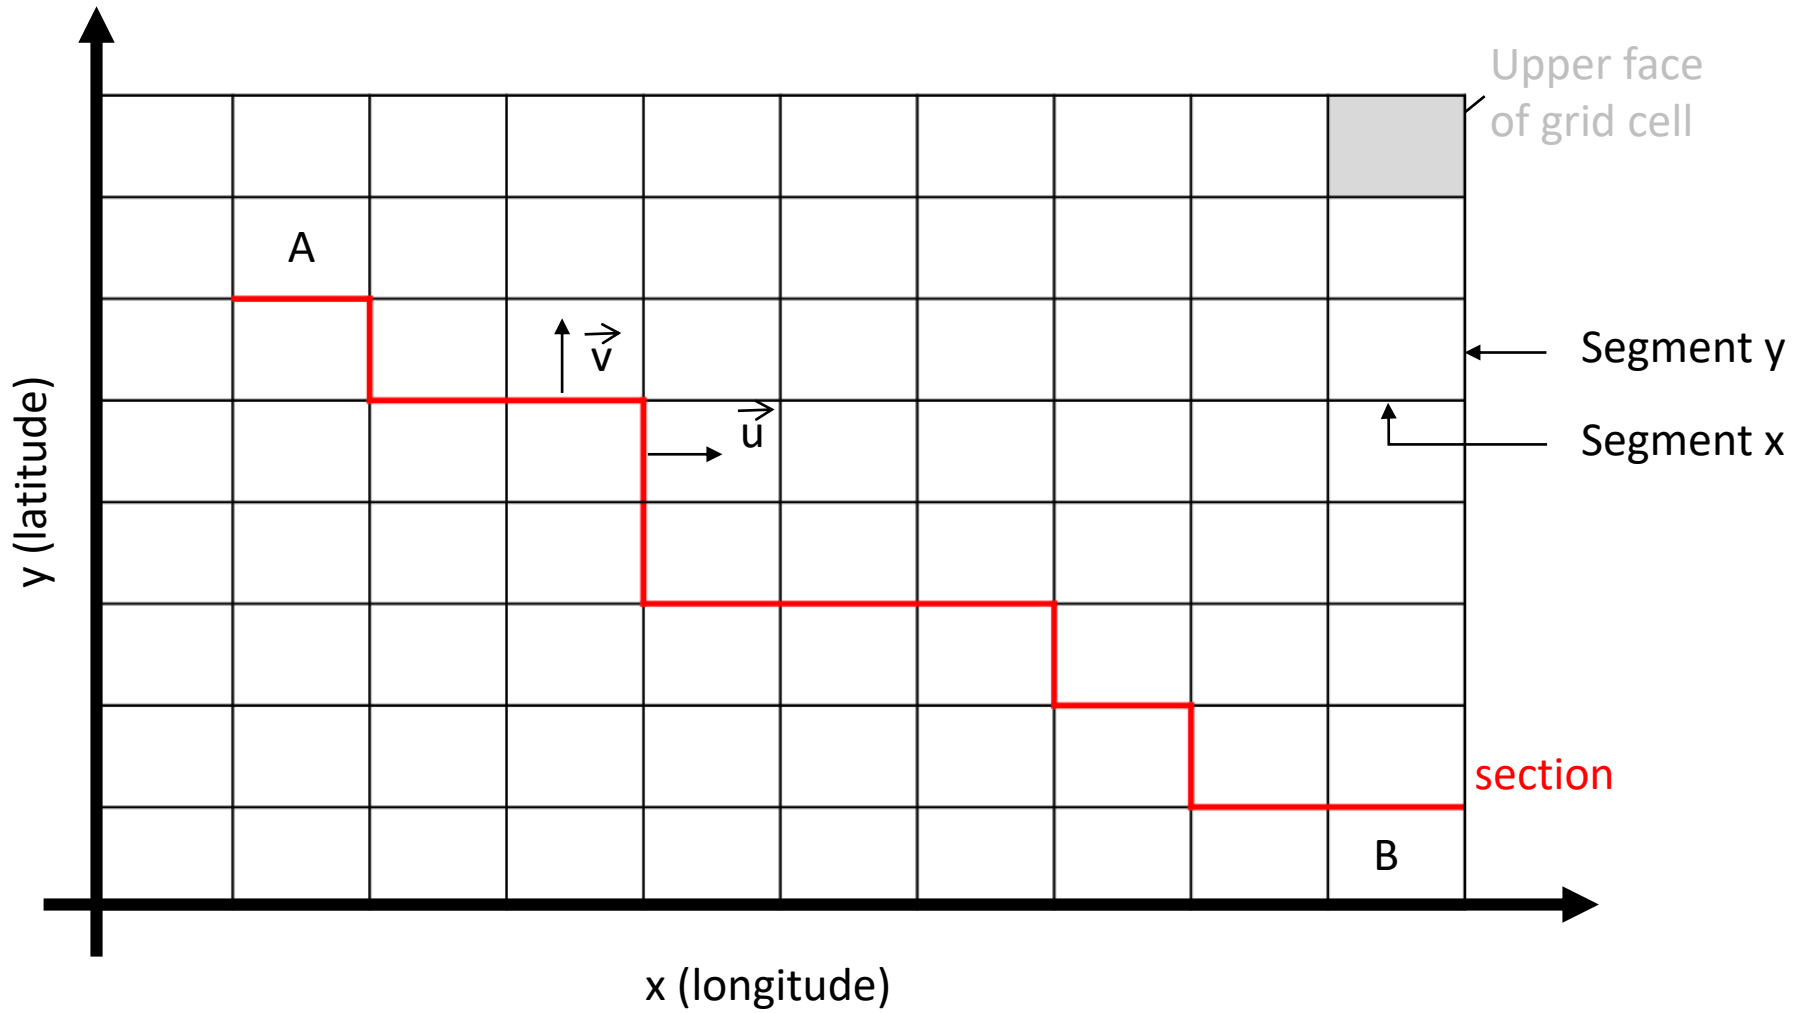

Fig. S2: Schematic representation of section in the model.

$$mT_{\text{Cant}}^{\text{adv}} + mT_{\text{Cant}}^{\text{lf}} + mT_{\text{Cant}}^{\text{eiv}} = mT_{\text{Cant}}^{\text{online}}$$

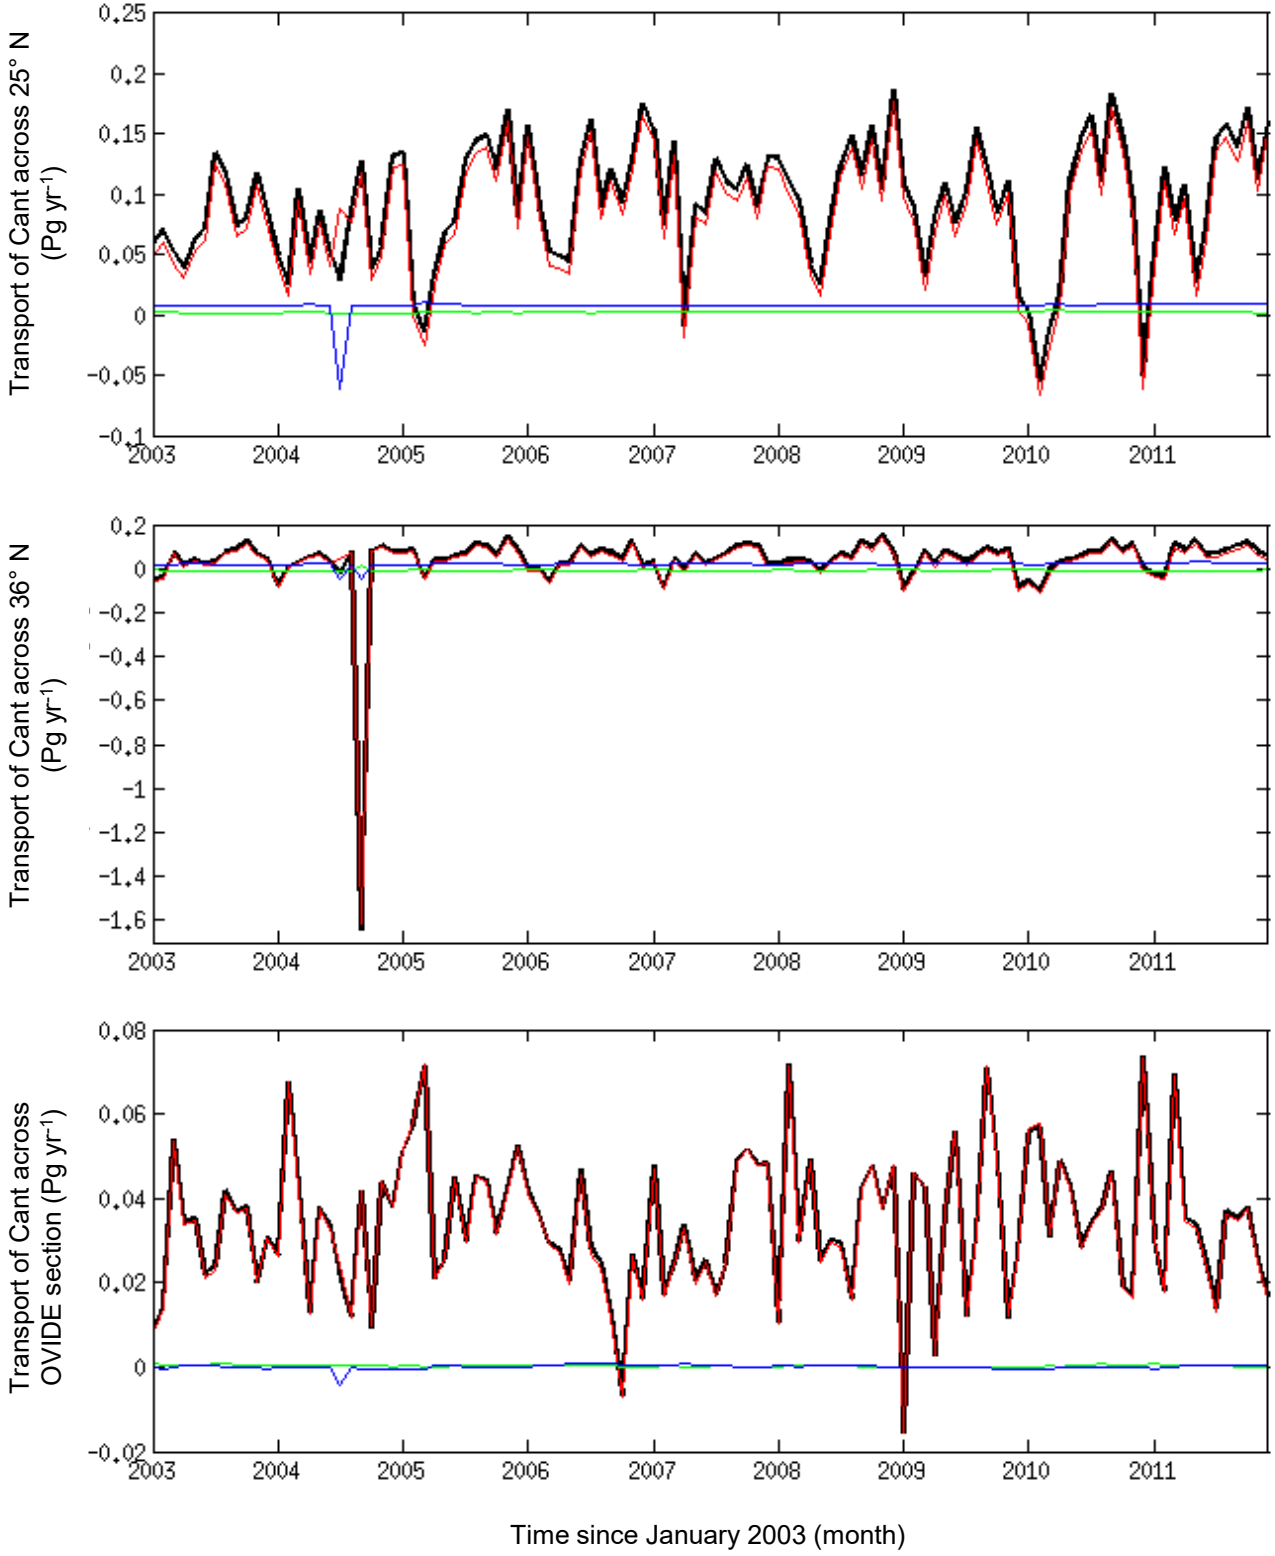

Fig. S3: Transport of Cant across (from top to bottom) 25° N, 36° N and OVIDE sections computed online by ORCA05-PISCES over the period 2003-2011 (monthly resolution). In the online approach, the transport of Cant ( $mT_{\text{Cant}}^{\text{online}}$ , black bold line) is the sum of the advection ( $mT_{\text{Cant}}^{\text{adv}}$ , red fine line), the diffusion ( $mT_{\text{Cant}}^{\text{lf}}$ , blue fine line) and the eddy ( $mT_{\text{Cant}}^{\text{eiv}}$ , green fine line) contribution. For each section,  $mT_{\text{Cant}}^{\text{adv}}$  is the major component of  $mT_{\text{Cant}}^{\text{online}}$ .



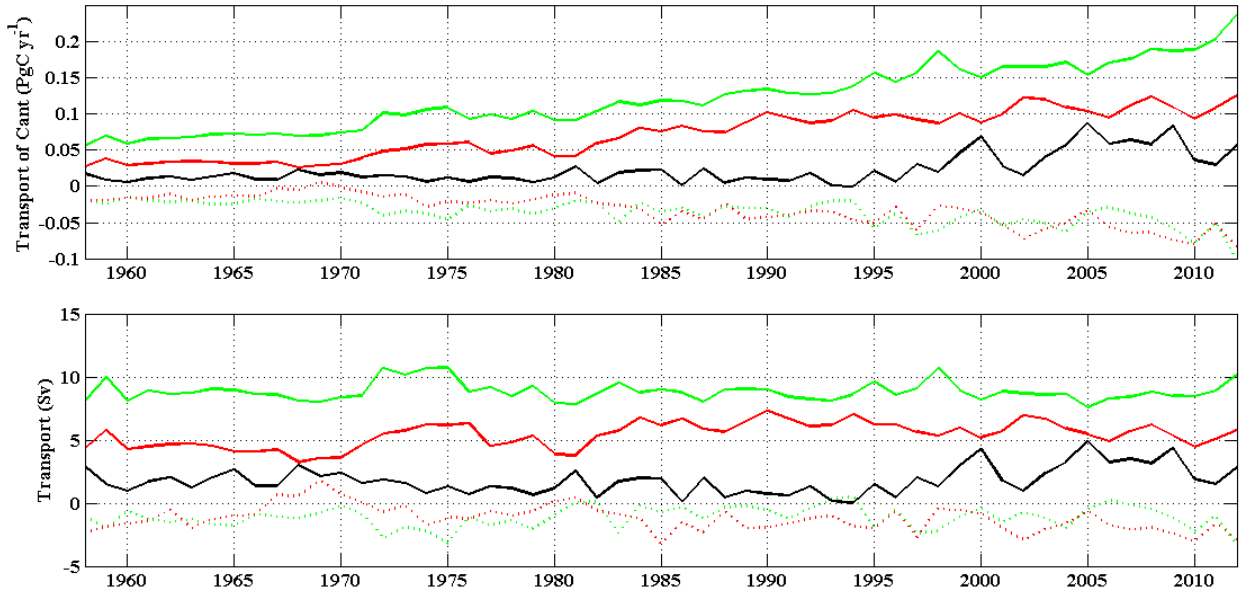

Fig S4a: Simulated annual time series of Cant and volume transported ( $\text{Pg yr}^{-1}$ ) by the northward (full line) and southward (dashed line) following components of NACW (class 1) through  $25^\circ\text{N}$  (green),  $36^\circ\text{N}$  (red) and OVIDE (black) over the period 1959-2011.

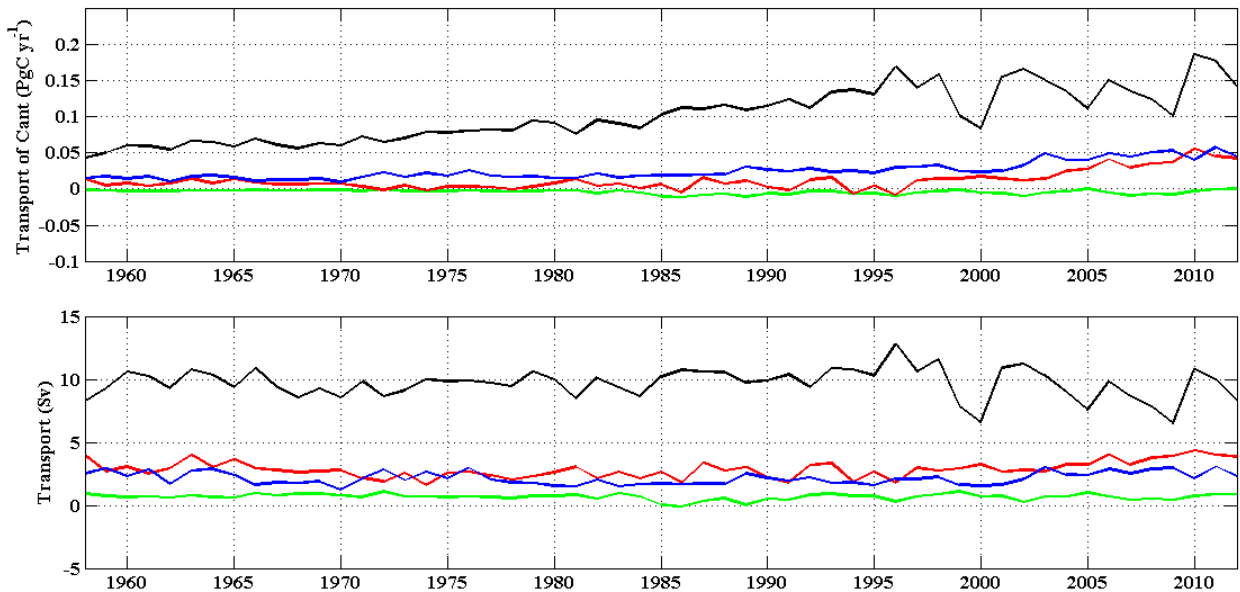

Fig S4b: Simulated annual time series of Cant and volume transported ( $\text{Pg yr}^{-1}$ ) within IW (class 2) through  $25^\circ\text{N}$  (green),  $36^\circ\text{N}$  (red), OVIDE (black) and the Greenland-Iceland-Scotland sills (blue) over the period 1959-2011.

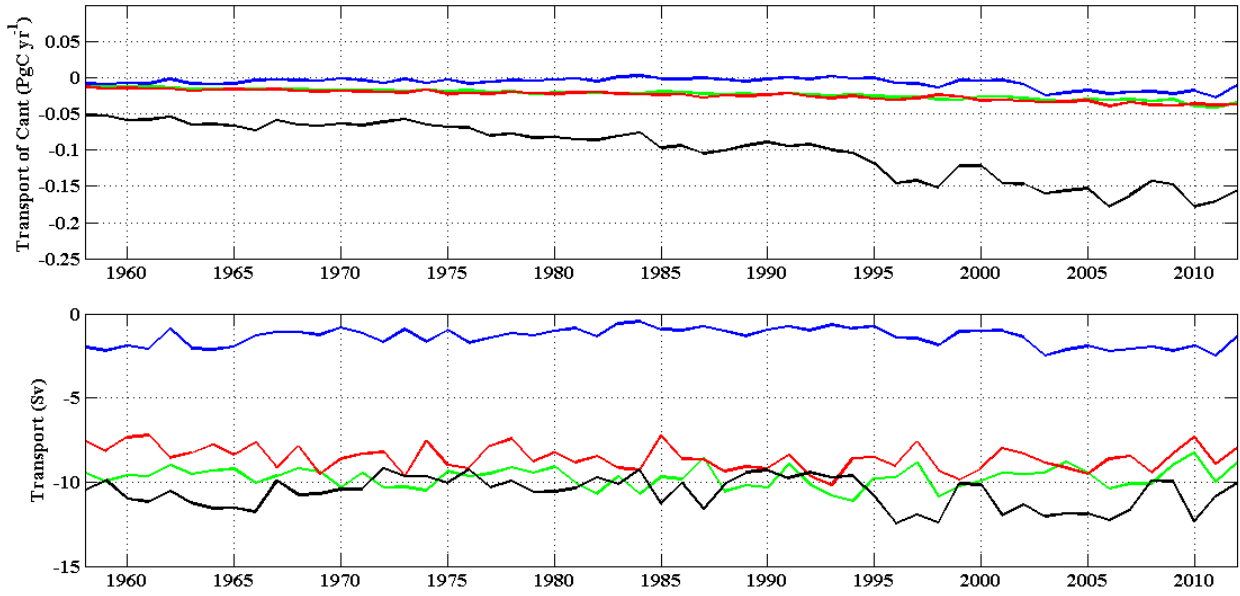

Fig S4c: : Simulated annual time series of Cant and volume transported (Pg yr<sup>-1</sup>) within NADW (Class 3) through 25°N (green), 36°N (red), OVIDE (black) and the Greenland-Iceland-Scotland sills (blue) over the period 1959-2011.
